# Supplementary material for: Transient Inhibition of PI3Kδ Enhances the Therapeutic Effect of Intravenous Delivery of Oncolytic Vaccinia Virus
Source: PubMed Central journal article supplement — Mol Ther. 2020 Feb 28;28(5):1263–75. doi: 10.1016/j.ymthe.2020.02.017 (PMC7210704; doi:10.1016/j.ymthe.2020.02.017), 2020-02-28
Supplement: mmc1.pdf [file mmc1.pdf]

YMTHE, Volume 28

## **Supplemental Information**

### **Transient Inhibition of PI3K $\delta$ Enhances the Therapeutic Effect of Intravenous Delivery of Oncolytic Vaccinia Virus**

**Mark S. Ferguson, Louisa S. Chard Dunmall, Rathi Gangeswaran, Giulia Marelli, James R. Tysome, Emily Burns, Maria A. Whitehead, Ezra Aksoy, Ghassan Alusi, Crispin Hiley, Jay Ahmed, Bart Vanhaesebroeck, Nicholas R. Lemoine, and Yaohe Wang**

A

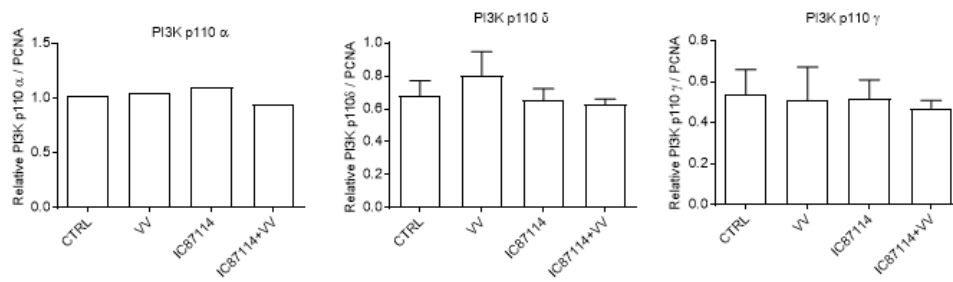

B

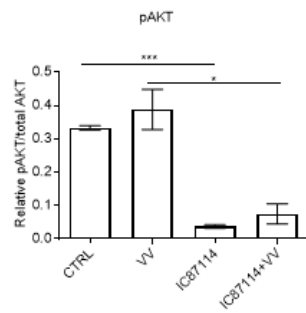

C

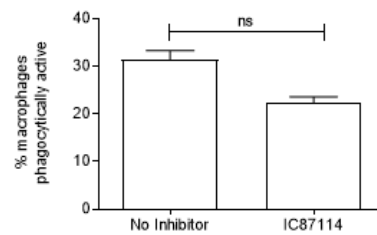

D

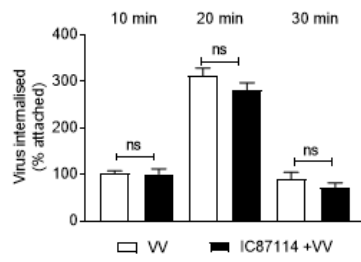

E

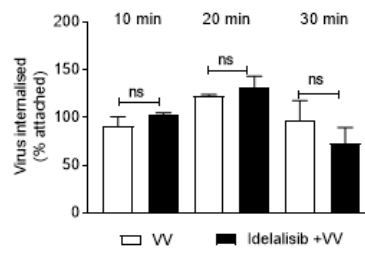

F

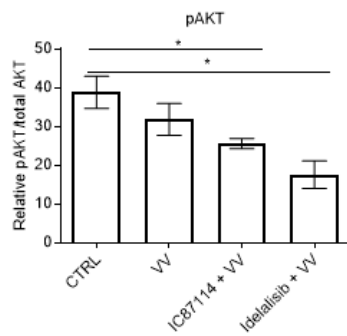

G

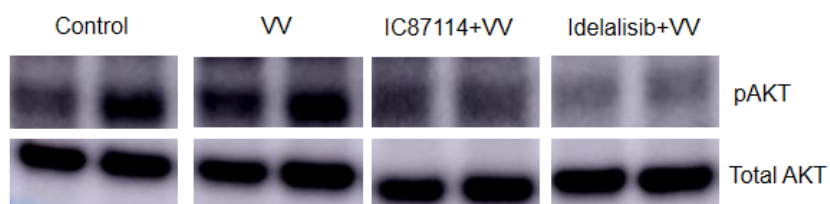

**Supplementary Figure 1. Pharmacological inhibition of PI3K $\delta$  has no effect on**

**phagocytosis or internalisation of VV in macrophages. (A)** Semi-quantification of western

blots of p110 isoform expression in macrophages treated with IC87114 (10  $\mu$ M)  $\pm$  VVL15

(MOI=5). Analysis was performed using the ImageJ program and the ratio of p110 isoforms

to the PCNA protein used as loading control is shown. **(B)** Semi-quantification of western

blots of p-AKT in macrophages treated with IC87114 (1  $\mu$ M) +/- VVL15 (MOI=5). Analysis was

performed using the ImageJ program and the p-AKT/ t-AKT is shown in the graph (n=3). Data

are presented as mean  $\pm$  SEM. \*P < 0.05, \*\*P<0.01, \*\*\*P < 0.001 (One-way ANOVA with

Newman-Keuls Multiple Comparison Test). **(C)** Phagocytosis of opsonised *Escherichia coli* K-

12 bioparticles by wild-type mouse macrophages treated or not with IC87114 (1  $\mu$ M). cells

were pre-treated for 2 h with IC87114 (1  $\mu$ M) or vehicle before addition of particles. **(D)**

Quantitative RT-PCR detection of the amount of VVL15 internalized in macrophages pooled

from two wild-type (WT) BALB/c mice pre-treated for 2 h with IC87114 (1  $\mu$ M) or vehicle

before addition of VVL15 at an MOI=5. Data are presented as the mean percentage of the

total attached virus that was internalized (n=6). \*P < 0.05, \*\*P<0.01, \*\*\*P < 0.001(Student's

Two-tailed unpaired t-test). **(E)** Quantitative RT-PCR detection of the amount of VVL15

internalized in macrophages pooled from two wild-type (WT) BALB/c mice pre-treated for 2

h with idelalisib (10  $\mu$ M) or vehicle before addition of VVL15 at an MOI=5. Data are

presented as the mean percentage of the total attached virus that was internalized (n=6). \*P

< 0.05, \*\*P<0.01, \*\*\*P < 0.001(Student's Two-tailed unpaired t-test). **(F)** Semi-quantification

of western blots of p-AKT in macrophages treated with idelalisib (10  $\mu$ M) +/- VVL15 (MOI=5).

Analysis was performed using the ImageJ and the p-AKT/t-AKT ratio is shown in the graph

(n=3). data are presented as mean  $\pm$  SEM. \*P < 0.05, \*\*P<0.01, \*\*\*P < 0.001 (One-Way

ANOVA with Newman-Keuls Multiple Comparison Test). **(G)** Immunoblot depicting p-AKT and total-AKT in macrophages treated with idelalisib (10  $\mu$ M) +/- VVL15 (MOI=5).

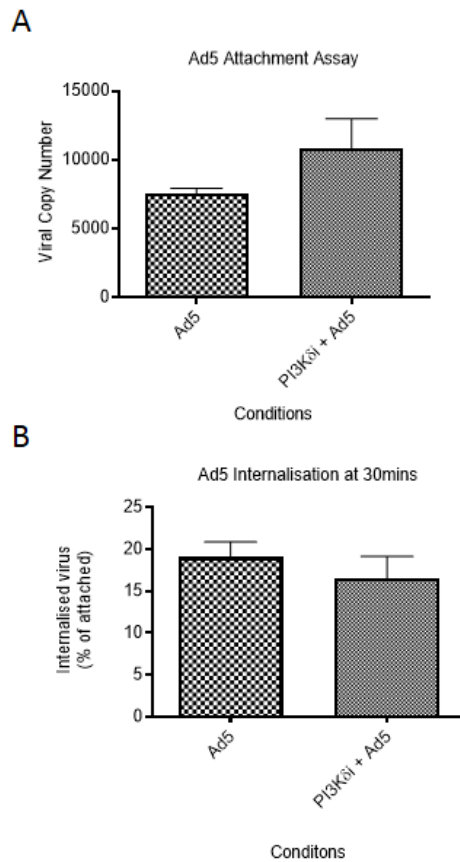

**Supplementary Figure 2. Attachment and internalisation of Ad5 to macrophages in vitro.**

**(A)** Quantitative RT–PCR detection of the amount of Ad5 attached to macrophages pooled from two wild-type (WT) BALB/c mice pre-treated for 2 h with IC87114 (1  $\mu$ M), a PI3K $\delta$  inhibitor, or vehicle before addition of Ad5 (n=3). A Student's Two-tailed unpaired t-test was used to determine significance. **(B)** Quantitative RT–PCR detection of the amount of Ad5 internalized in macrophages treated as for **(A)** after 30 minutes. Data are presented as the mean percentage of the total attached virus that was internalized (n=3). A Student's Two-tailed unpaired t-test was used to determine significance.

A

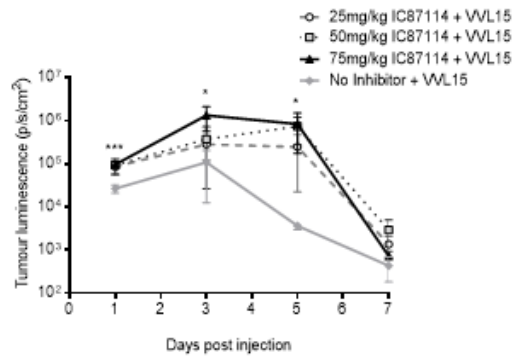

B

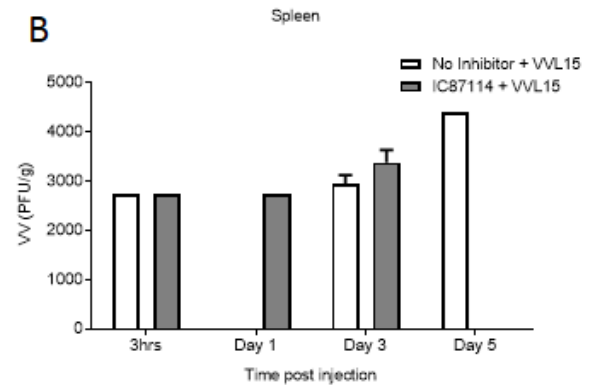

C

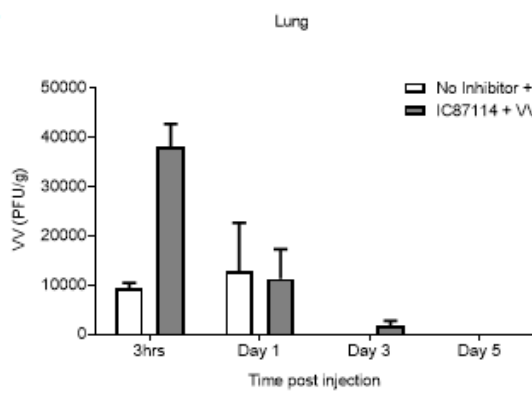

D

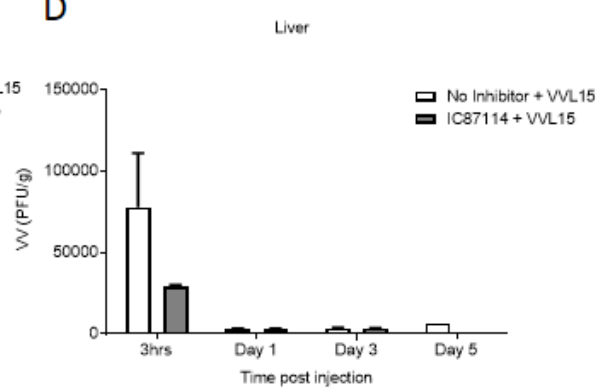

E

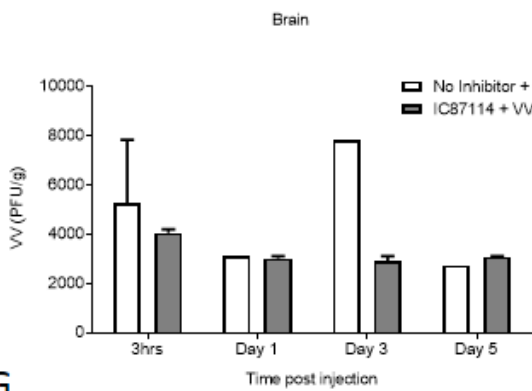

F

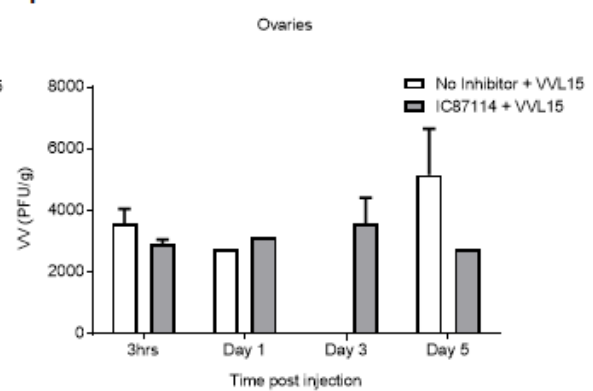

G

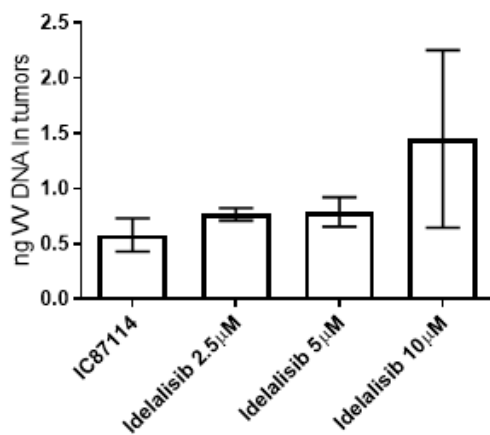

**Supplementary Figure 3. Pharmacological inhibition of PI3K $\delta$  has no effect on off-target uptake of VVL15.** (A) Four BALB/c mice bearing CT26 flank tumours received either one of the various doses of IC87714 or vehicle buffer three hours before one intravenous injection of  $1 \times 10^8$  PFU VVL15. Biodistribution of VVL15 was ascertained by In Vivo Imaging System (IVIS) under inhalation anesthesia from 5 minutes following intra-peritoneal (IP) injection of D-Luciferin ( $15 \text{ mg ml}^{-1}$ ). Mean luminescence values of tumours  $\pm$  SEM are displayed. There was no significant difference between the group pretreated with  $25 \text{ mg kg}^{-1}$  and the no inhibitor group. The group pretreated with  $50 \text{ mg kg}^{-1}$  IC87114 and the no inhibitor group; there was significantly more signal detected from the group pretreated with  $50 \text{ mg kg}^{-1}$  IC87114 at day 5 ( $P < 0.01$ ). The group pretreated with  $75 \text{ mg kg}^{-1}$  IC87114 and the no inhibitor group; significance is depicted on the graph. There was significantly more signal detected from the group pretreated with  $75 \text{ mg kg}^{-1}$  IC87114 at days 1, 3 and 5 ( $P < 0.001$  at day 1 and  $P < 0.05$  at days 3 & 5). (B-F) Immunocompetent mice bearing CT26 tumors were injected once i.v. with  $1 \times 10^8$  PFU VVL15. Organs were isolated at the indicated timepoints and the amount of virus present determined using qPCR ( $n=3/\text{group}$ ). Virus accumulation in the spleen (B), lungs (C), liver (D), brain (E) and ovaries (F) was examined. (G) CT26 tumor-bearing immunocompetent mice were treated with IC87114 ( $75 \text{ mg/kg}$ ) or varying doses idelalisib 3 h prior to i.v. delivery of  $1 \times 10^8$  PFU VVL15. 3 days post treatment, tumors were analysed for the presence of VV using quantitative RT-PCR.

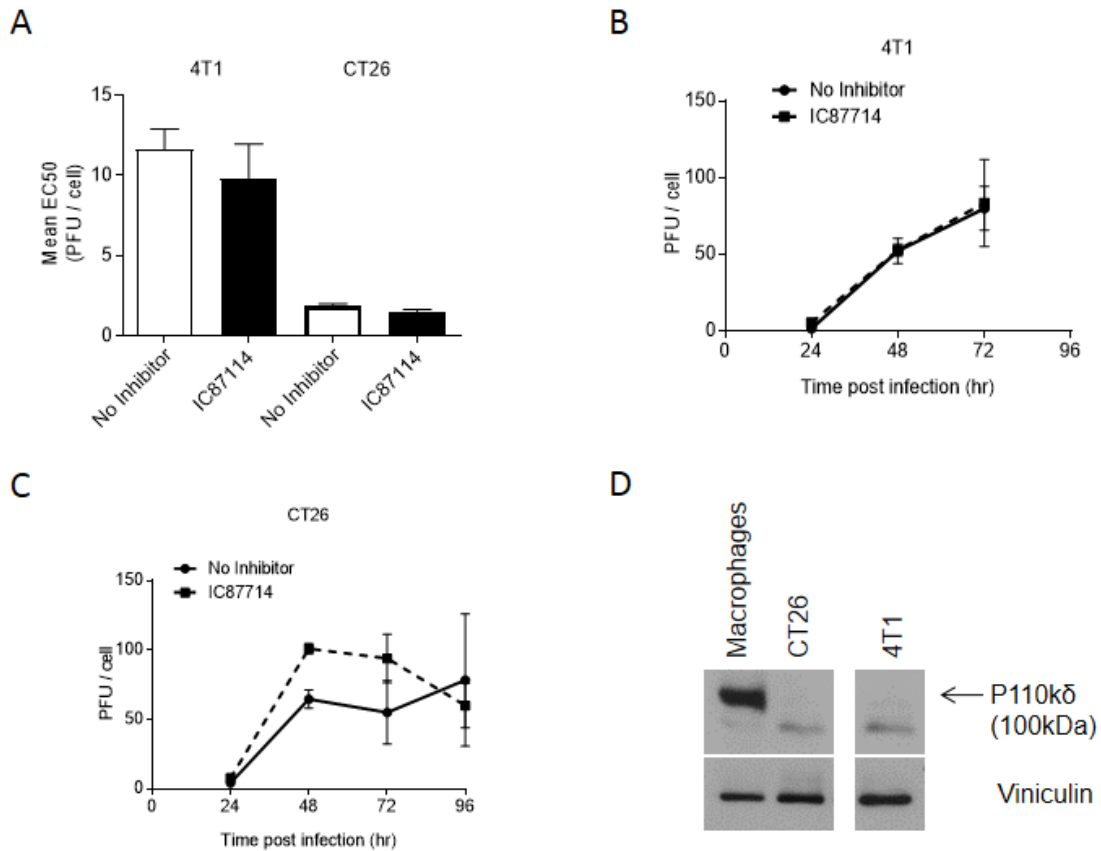

**Supplementary Figure 4. Pharmacological inhibition of PI3K $\delta$  has no effect on virus replication and cytotoxicity *in vitro*.** (A) Direct cytotoxicity of VVL15 in CT26 and 4T1 cancer cell lines upon addition of IC87114. The mean EC50 value/cell is shown. All experiments were performed in duplicate (n=4). There are no statistical differences between any of the groups. (B-C) TCID<sub>50</sub> assay for the replication of VVL15 after the addition of IC87114 to cultures of CT26 (B) and 4T1 (C) cell lines (n=3). There is no significant difference between any of the groups in any of the cell lines. (D) Western blot assay of p110 $\delta$  in CT26 and 4T1 lysates. Vinculin is shown as a loading control.
